# Supplementary material for: A 3-day EGCG-supplementation reduces interstitial lactate concentration in skeletal muscle of overweight subjects
Source: PubMed Central journal article supplement (PMC4673403; doi:10.1038/srep17896), 2015-12-09
Supplement: srep17896-s1.pdf [file srep17896-s1.pdf]

1 **Supplementary information**

2

3 **A 3-day EGCG-supplementation reduces interstitial lactate concentration in skeletal**  
4 **muscle of overweight subjects**

5 Jasper Most<sup>1</sup>, Judith GP van Can<sup>1</sup>, Jan-Willem van Dijk<sup>2</sup>, Gijs H Goossens<sup>1</sup>, Johan Jocken<sup>1</sup>,  
6 Jeannette J Hospers<sup>3</sup>, Igor Bendik<sup>3</sup>, Ellen E. Blaak<sup>1</sup>.

7 <sup>1</sup> *Department of Human Biology, NUTRIM School of Nutrition and Translational Research in*  
8 *Metabolism, Maastricht University Medical Centre+, Maastricht, The Netherlands.*

9 <sup>2</sup> *Department of Human Movement Sciences, NUTRIM School of Nutrition and Translational*  
10 *Research in Metabolism, Maastricht University Medical Centre, Maastricht, The*  
11 *Netherlands.*

12 <sup>3</sup> *DSM Nutritional Products, Basel, Switzerland.*

13

14

Supplementary Table S1. Overview of primers and probes for RT-PCR of adipose tissue biopsies.

|        | forward                      | reverse                       | Probes                                              |
|--------|------------------------------|-------------------------------|-----------------------------------------------------|
| 18S    | CGGCTACCACATCC<br>AAGGAA     | GCTGGAATTACCG<br>CGGCT        | 5'-VIC-<br>TGCTGGCACCAGACTTGCC<br>CTC-TAMRA-3       |
| HSL    | CTGCATAAGGGATG<br>CTTCTATGG  | CCTGTCTCGTTGCG<br>TTTGTAGT    | 5'-FAM-<br>CTGCCTGGGCTTCCAGTTCA<br>CGC-TAMRA-3      |
| ATGL   | TAGAGTGGCAGGTT<br>GTCTGAAATG | CCCGTGTACTGTG<br>GGCTCAT      | 5'-FAM-<br>CACCATCCACGTAGCGCAC<br>CCC -TAMRA-3      |
| CPT-1  | CCATGTTGTACAGCT<br>TCCAGACA  | CACCGACTGTAGA<br>TACCTGTTTACA | 5'-FAM-<br>CTGCCTCGCCTGCCGGTCC-<br>TAMRA-3          |
| ACC-1  | CAGCAGGCTGAACT<br>TCACACA    | CTGGAAGGCAGTA<br>TCCATTCATT   | 5'-FAM-<br>CACGGATCCAGAGCACGGC<br>ACTC-TAMRA-3      |
| Leptin | CCAAAACCCTCATC<br>AAGACAATT  | GAATGAAGTCCAA<br>ACCGGTGA     | 5'-FAM-<br>CACGCAGTCAGTCTCCTCC<br>AAACAGAAA-TAMRA-3 |

15 HSL, Hormone-sensitive lipase; ATGL, Adipose triglyceride lipase; CPT-1, Carnitine-

16 Palmitoyl-transferase-1; ACC-1, Acetyl-Coenzyme-A-Carboxylase.
